# Supplementary material
Source: Springer Nature journal article supplement (https://www.springermedizin.de/resource/supplementary/12943_2008_353_MOESM4_ESM.pdf/9553994)

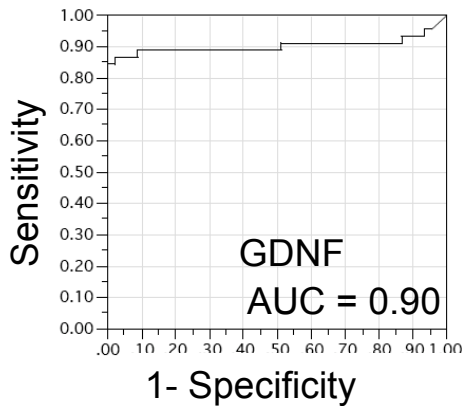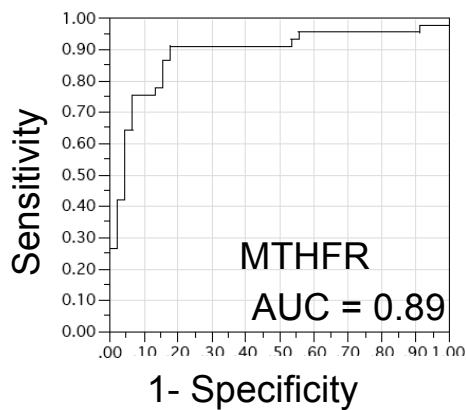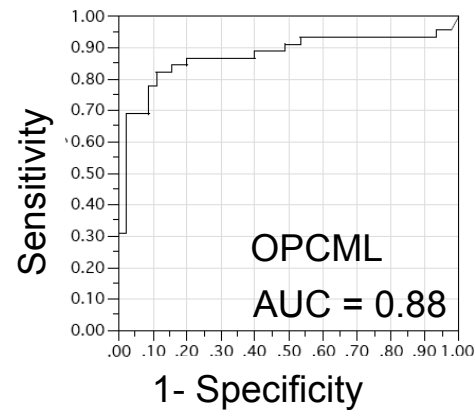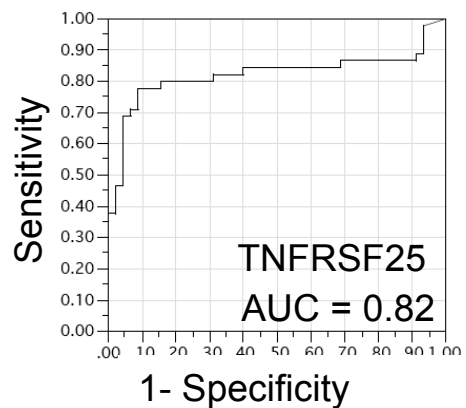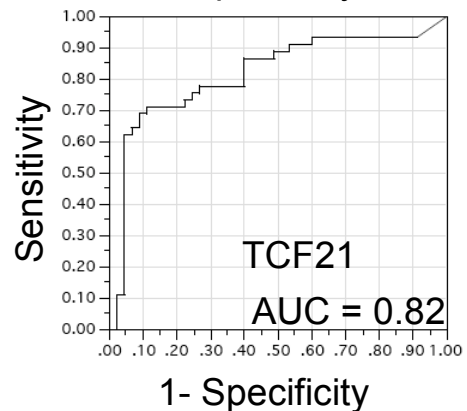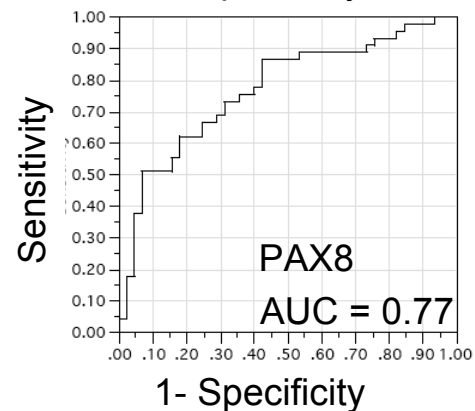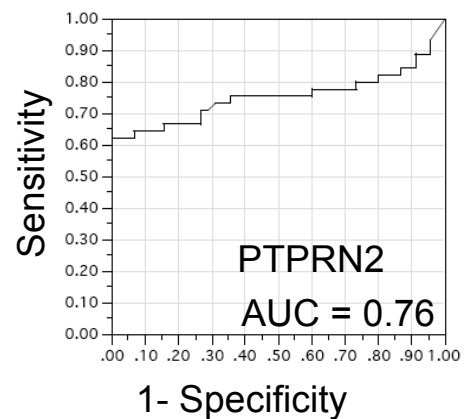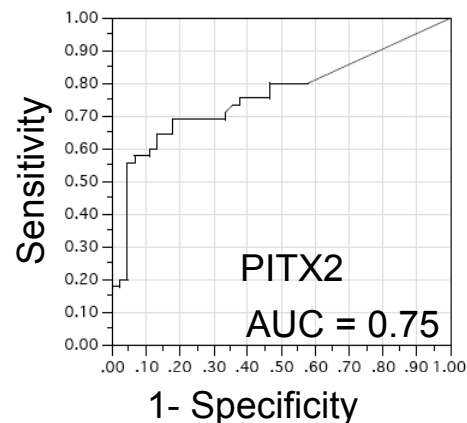

Supplement: MOESM4 [file 9553994]
